# Supplementary material
Source: PubMed Central journal article supplement (PMC10105084)
Supplement: mmc1.pdf [file mmc1.pdf]

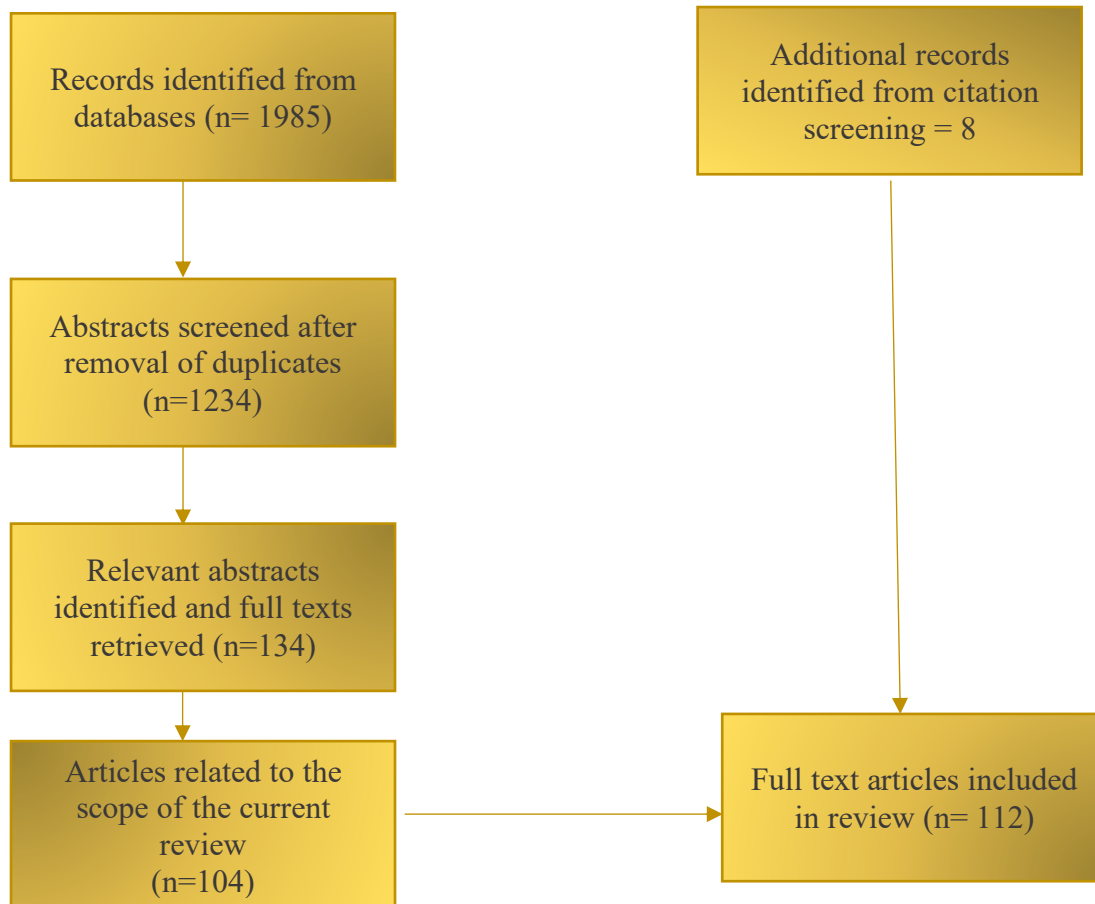

Supplemental figure 1- flow chart showing the summary of the search strategy

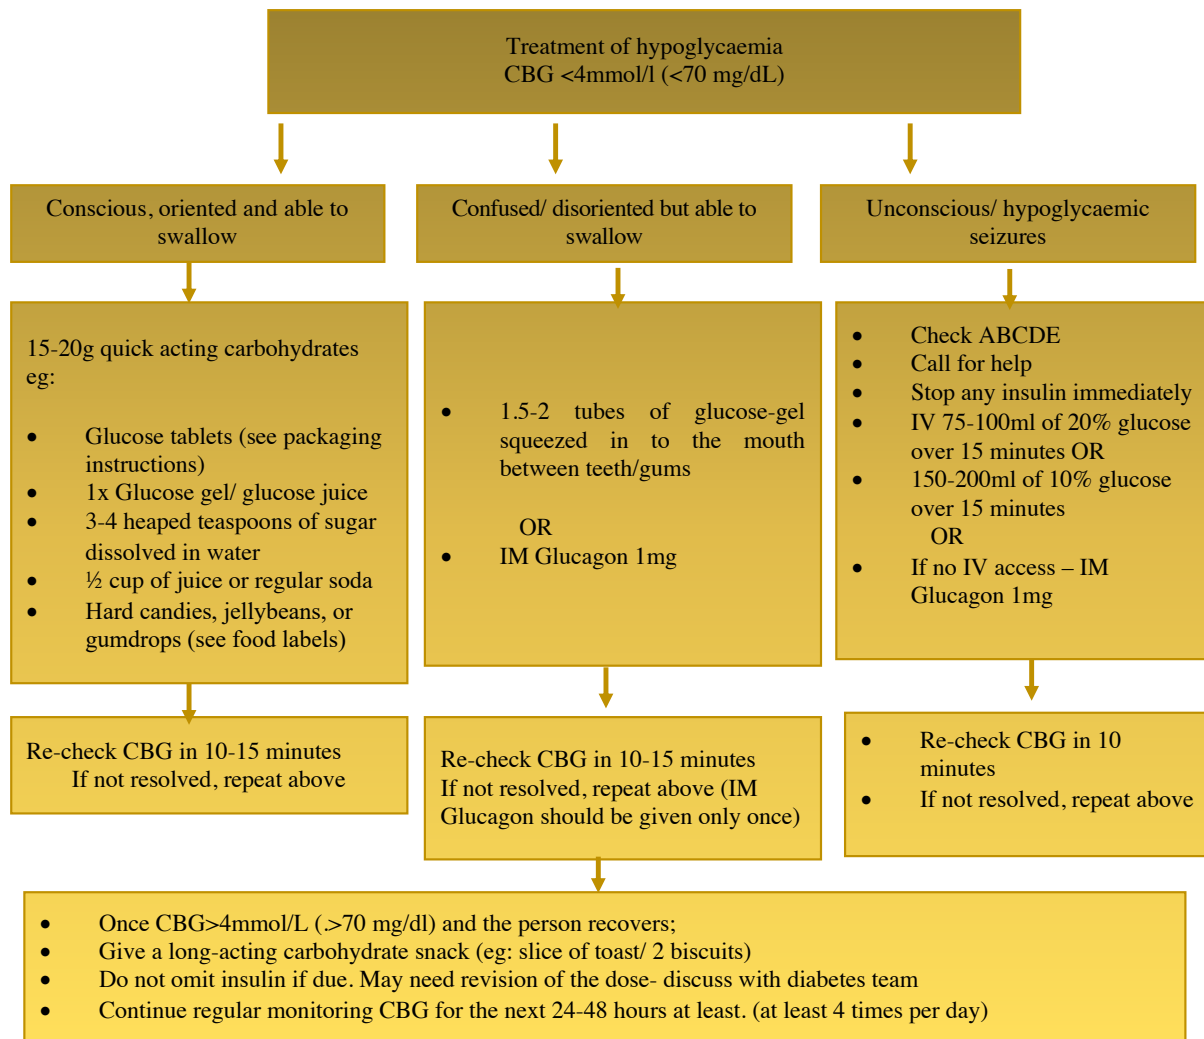

Supplemental figure 2: Initial management of hypoglycaemia

CBG – capillary blood glucose, ABCDE- airway, breathing, circulation, disability, exposure, IV- intravenous, IM- intramuscular

## Gold Score

|                                                |   |   |   |   |   |   |   |       |
|------------------------------------------------|---|---|---|---|---|---|---|-------|
| How well can you detect onset of hypoglycaemia |   |   |   |   |   |   |   |       |
| Always                                         | 1 | 2 | 3 | 4 | 5 | 6 | 7 | Never |

A score of 4 or above suggests impaired hypoglycaemia awareness.

## Clarke Score

|                                                                                                                                                                                  |                      |                       |                  |                            |            |
|----------------------------------------------------------------------------------------------------------------------------------------------------------------------------------|----------------------|-----------------------|------------------|----------------------------|------------|
| 1. Do you feel hypoglycaemia symptoms when your blood glucose is low                                                                                                             |                      |                       |                  |                            |            |
| Always (1)                                                                                                                                                                       | Sometimes (2)        | Never                 |                  |                            |            |
| Have you lost some of the symptoms that used to occur when your blood sugar was low?                                                                                             |                      |                       |                  |                            |            |
| Yes (1)                                                                                                                                                                          | No (0)               |                       |                  |                            |            |
| 2. In the past six months how often have you had moderate hypoglycaemia episodes where you might have been confused, disoriented or lethargic and were unable to treat yourself? |                      |                       |                  |                            |            |
| Never (0)                                                                                                                                                                        | Once or twice (1)    | Every other month (2) | Once a month (3) | More than once a month (4) |            |
| 3. In the past year how often have you had severe hypoglycaemia where you were unconscious or had a seizure or needed glucagon or intravenous glucose?                           |                      |                       |                  |                            |            |
| Never (0)                                                                                                                                                                        | 1-3 times (1)        | 4-7 times (2)         | 8-11 times (3)   | >12 times (4)              |            |
| 4. How often in the last month have you had readings < 3.9 mmol/L with symptoms?                                                                                                 |                      |                       |                  |                            |            |
| Never (0)                                                                                                                                                                        | 1-3 times (1)        | 1/week (2)            | 2-3/week (3)     | 4-5/week (4)               | Daily (5)  |
| 5. How often in the last month have you had readings < 3.9 mmol/L without symptoms                                                                                               |                      |                       |                  |                            |            |
| Never (0)                                                                                                                                                                        | 1-3 times (2)        | 1/week (4)            | 2-3/week (6)     | 4-5/week (8)               | Daily (10) |
| 6. How low does your blood sugar go before you feel symptoms?                                                                                                                    |                      |                       |                  |                            |            |
| 3.3 - 3.8 mmol/L (1)                                                                                                                                                             | 2.8 - 3.3 mmol/L (2) | 2.2 - 2.7 mmol/L (3)  | <2.2 mmol/L (4)  |                            |            |
| 7. To what extent can you tell low blood sugars by your symptoms?                                                                                                                |                      |                       |                  |                            |            |
| Never (4)                                                                                                                                                                        | Rarely (3)           | Sometimes (2)         | Often (1)        | Always (0)                 |            |

Supplemental figure 3: Assessment of hypoglycaemia awareness – Gold and Clarke scores
